# Supplementary material for: Sex-specific differences in peripheral blood leukocyte transcriptional response to LPS are enriched for HLA region and X chromosome genes
Source: PubMed Central journal article supplement (PMC7806814; doi:10.1038/s41598-020-80145-z), 2021-01-13
Supplement: 41598_2020_80145_MOESM1_ESM.pdf [file 41598_2020_80145_MOESM1_ESM.pdf]

**Sex-specific differences in peripheral blood leukocyte transcriptional response to LPS are enriched for HLA region and X chromosome genes**

Michelle M. Stein<sup>^</sup>, Mitch Conery<sup>^</sup>, Kevin M. Magnaye, Selene M. Clay, Christine Billstrand, Raluca Nicolae, Katherine Naughton, Carole Ober, Emma E. Thompson\*

Department of Human Genetics, University of Chicago, Chicago, IL 60637, USA.

<sup>^</sup>These authors contributed equally.

\*Corresponding author.

Corresponding author email: [eethomps@uchicago.edu](mailto:eethomps@uchicago.edu)

A) Males

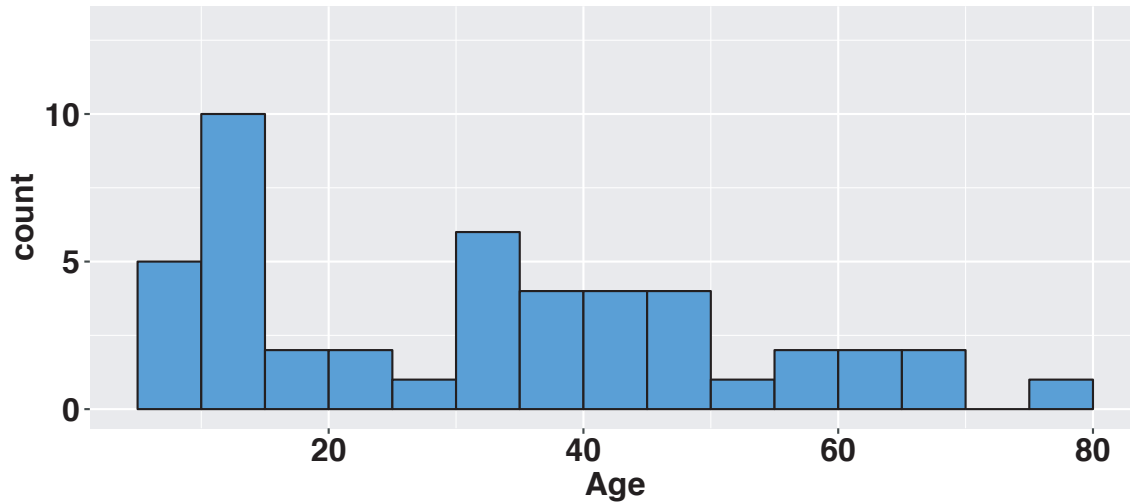

B) Females

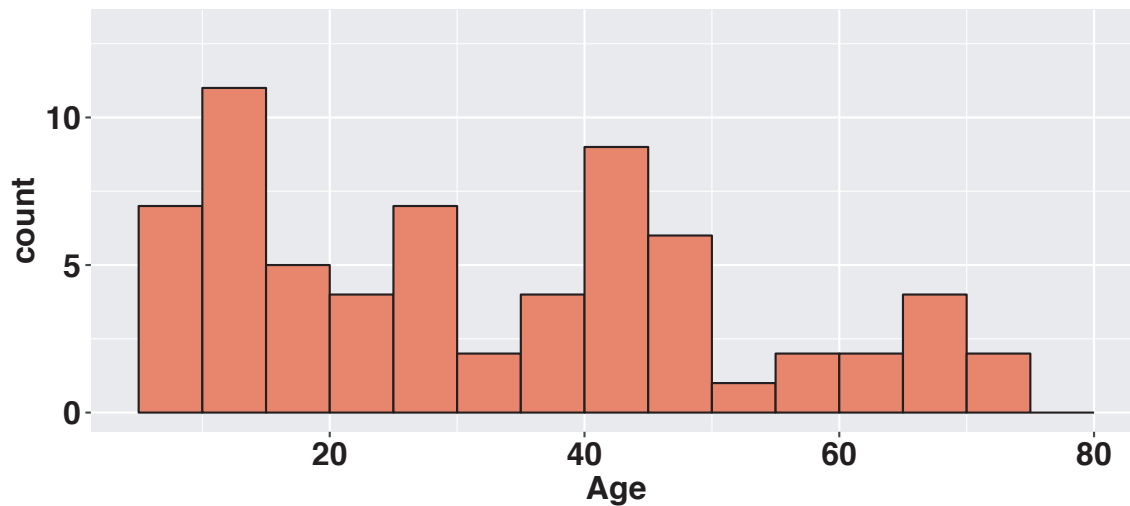

**Supplementary Figure S1.** Histograms of age (range 6-80 years), for males (A) and females (B). The peaks at <15 and 40-50 years are a result of the sampling strategy used to enrich for school children and their parents (see Methods). In females, the mean age = 33.08 (SD=19.25) and median age = 29 ( $Q_1=15$ ,  $Q_3=47$ ). In males, the mean age = 32.5 (SD=19.51) and median age = 34 ( $Q_1=13$ ,  $Q_3=46$ ). Age distributions were not significantly different between males and females (Kolmogorov-Smirnov test  $P=0.108$ ).

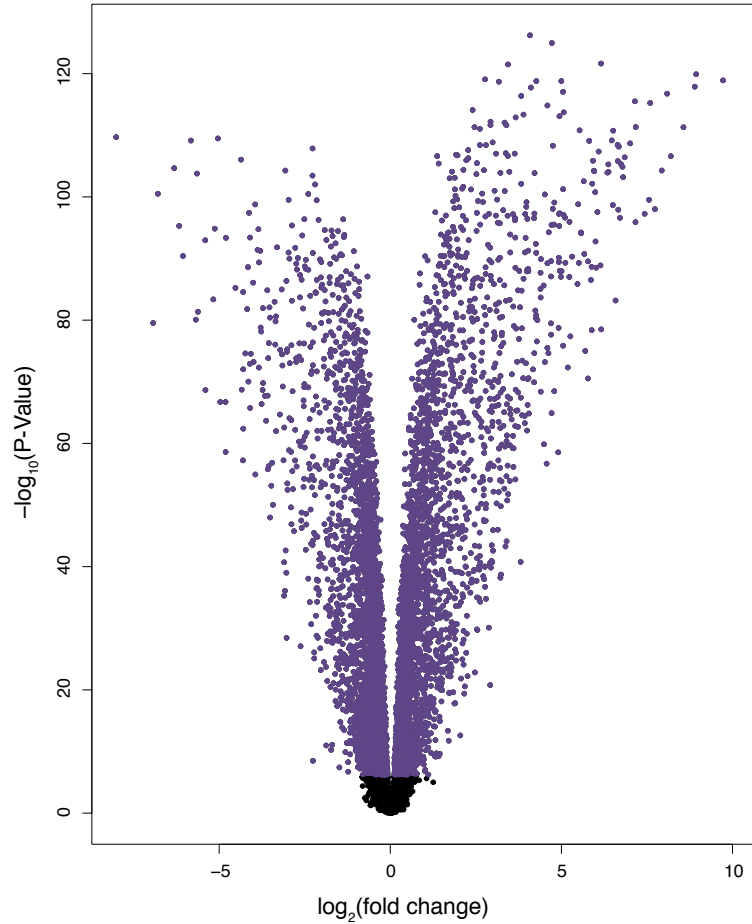

**Supplementary Figure S2.** Volcano plot showing transcriptional responses to LPS compared to vehicle treatment. Magnitude of autosomal transcriptional responses following LPS treatment in the combined sample. Purple dots represent genes differentially expressed at FDR<0.05; dots in black are not significant. Log<sub>2</sub>(fold change) is plotted along the X axis and -log<sub>10</sub>(P value) is plotted on the Y axis.

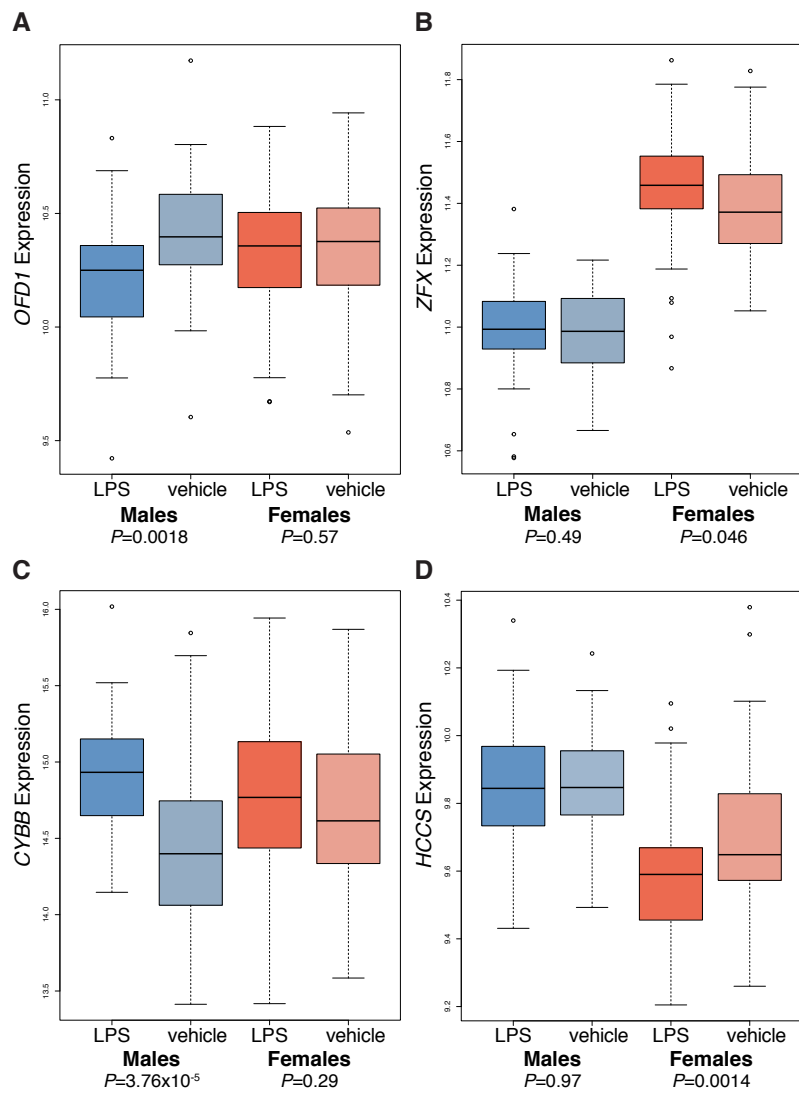

**Supplementary Figure S3.** Examples of sex-specific responses to LPS among X-chromosome genes. Boxplots of escape genes are shown in panels A and B and of non-escape genes in panels C and D. (A) *OFD1*, Oral-facial-digital syndrome 1 protein; (B) *ZFX*, Zinc finger protein X-linked; (C) *CYBB*, Cytochrome B-245 beta chain; (D) *HCCS*, Holocytochrome C synthase.

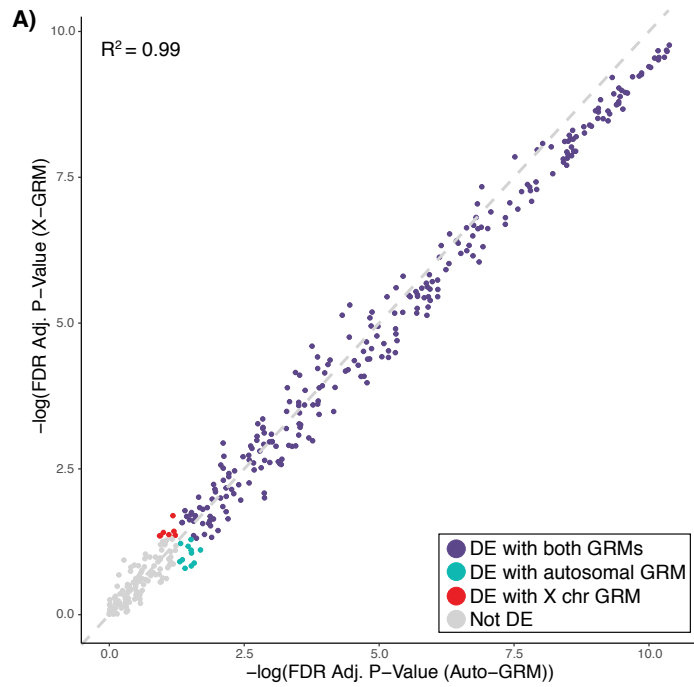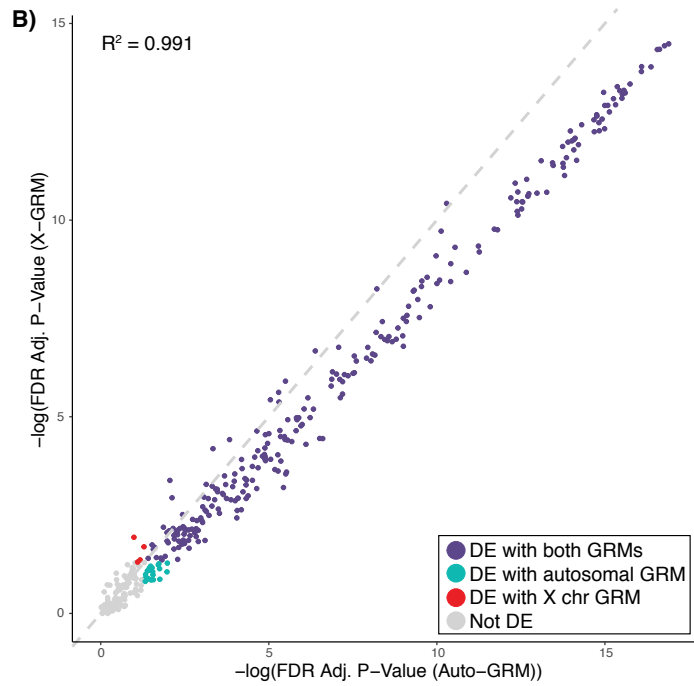

**Supplementary Figure S4.** Correlation plots showing the differential expression of X chromosome genes in (A) males and (B) females using autosomal (x-axis) and X chromosome (y-axis) based genetic relatedness matrices (GRMs).

**Supplementary Table S3.** Estimated proportions (1) of most common cell types (>5%) and activation states in vehicle- and LPS-treated PBLs.

| Estimated Cell Type            | Vehicle-Treated Samples |        |                 | LPS-treated Samples |       |                 |
|--------------------------------|-------------------------|--------|-----------------|---------------------|-------|-----------------|
|                                | Females                 | Males  | <i>P</i> -value | Females             | Males | <i>P</i> -value |
| Monocytes                      | 0.079                   | 0.074  | 0.0074          | 0.016               | 0.017 | 0.25            |
| Neutrophils                    | 0.27                    | 0.28   | 0.38            | 0.11                | 0.11  | 0.41            |
| NK cells, resting              | 0.14                    | 0.14   | 0.10            | 0.11                | 0.090 | 0.28            |
| CD4+ T cells, memory resting   | 0.21                    | 0.21   | 0.19            | 0.091               | 0.087 | 0.43            |
| CD4+ T cells, memory activated | 0.0020                  | 0.0028 | 0.05            | 0.15                | 0.16  | 0.40            |
| CD8+ T cells                   | 0.20                    | 0.20   | 0.19            | 0.16                | 0.15  | 0.17            |
| Mast cells, activated          | 0.0055                  | 0.0058 | 0.50            | 0.061               | 0.059 | 0.44            |

1. Newman AM, Liu CL, Green MR, Gentles AJ, Feng W, Xu Y, et al. Robust enumeration of cell subsets from tissue expression profiles. *Nat Methods*. 2015; 12(5):453-7.

**Supplementary Table S5.** Genes identified in Tukiainen et al. (2) that escape X inactivation in whole blood.

*P2RY8*  
*BEND2*  
*GEMIN8*  
*STS*  
*OFD1*  
*CDK16*  
*TRAPPC2*  
*NAA10*  
*IL9R*  
*AKAP17A*  
*MED14*  
*CSF2RA*  
*FUNDC1*  
*DHRSX*  
*ZBED1*  
*CD99*  
*JPX*  
*CXorf38*  
*TXLNG*  
*PNPLA4*  
*CA5B*  
*UBA1*  
*DDX3X*  
*ARSD*  
*SMC1A*  
*ZRSR2*  
*EIF2S3*  
*KDM5C*  
*PRKX*  
*RP11-  
706O15.1*  
*HDHD1*  
*ZFX*  
*RPS4X*  
*EIF1AX*  
*KDM6A*  
*XIST*

2. Tukiainen T, Villani AC, Yen A, Rivas MA, Marshall JL, Satija R, Aguirre M, Gauthier L, Fleharty M, Kirby A, Cummings BB, Castel SE, Karczewski KJ, Aguet F, Byrnes A, Consortium GT, Laboratory DA, Coordinating Center -Analysis Working G, Statistical Methods groups-Analysis Working G, Enhancing Gg, Fund NIHC, Nih/Nci, Nih/Nhgri, Nih/Nimh, Nih/Nida, Biospecimen Collection Source Site N, Biospecimen Collection Source Site R, Biospecimen Core Resource V, Brain Bank Repository-University of Miami Brain Endowment B, Leidos Biomedical-Project M, Study E, Genome Browser Data I, Visualization EBI, Genome Browser Data I, Visualization-Ucsc Genomics Institute UoCSC, Lappalainen T, Regev A, Ardlie KG, Hacohen N, MacArthur DG. Landscape of X chromosome inactivation across human tissues. *Nature*. 2017;550(7675):244-8. PMID: PMC5685192.



**Supplementary Table S6.** Posterior means and lfsrs (local false sign rates) of HLA eGenes. Genes are presented in order from the telomeric to the centromeric end of the short arm of chromosome 6.

| Gene      | Females/LPS            |                | Females/VEH            |                | Males/LPS              |                | Males/VEH              |                |
|-----------|------------------------|----------------|------------------------|----------------|------------------------|----------------|------------------------|----------------|
|           | lfsr                   | Posterior Mean | lfsr                   | Posterior Mean | lfsr                   | Posterior Mean | lfsr                   | Posterior Mean |
| HLA-F     | $4.46 \times 10^{-7}$  | 0.307          | $1.76 \times 10^{-8}$  | 0.328          | $5.80 \times 10^{-5}$  | 0.276          | $2.73 \times 10^{-5}$  | 0.291          |
| HLA-C     | 0.008                  | 0.489          | 0.011                  | 0.473          | 0.013                  | 0.417          | 0.021                  | 0.403          |
| HLA-B*    | $3.46 \times 10^{-4}$  | -0.513         | $3.96 \times 10^{-4}$  | -0.533         | $3.85 \times 10^{-4}$  | -0.447         | $4.51 \times 10^{-4}$  | -0.460         |
| HLA-DRA   | $3.57 \times 10^{-5}$  | 0.512          | 0.339                  | 0.067          | 0.059                  | 0.380          | 0.289                  | 0.114          |
| HLA-DQB1* | $3.79 \times 10^{-9}$  | 0.946          | $2.90 \times 10^{-8}$  | 0.982          | $4.84 \times 10^{-9}$  | 0.911          | $3.31 \times 10^{-5}$  | 0.909          |
| HLA-DQA2  | $2.52 \times 10^{-12}$ | 2.058          | $1.75 \times 10^{-14}$ | 2.108          | $5.96 \times 10^{-11}$ | 1.970          | $7.31 \times 10^{-11}$ | 2.003          |
| HLA-DOA   | 0.014                  | -0.230         | 0.022                  | -0.224         | 0.028                  | -0.211         | 0.027                  | -0.204         |

\*Gene also exhibits a sex by treatment interaction at FDR<0.05 (see Table 2).
